# Supplementary material
Source: Springer Nature journal article supplement (https://www.springermedizin.de/resource/supplementary/12884_2014_1060_MOESM2_ESM.pdf/9458844)

◆ Deliveries    ■ 1st ANC Visit    ▲ 4th ANC Visit

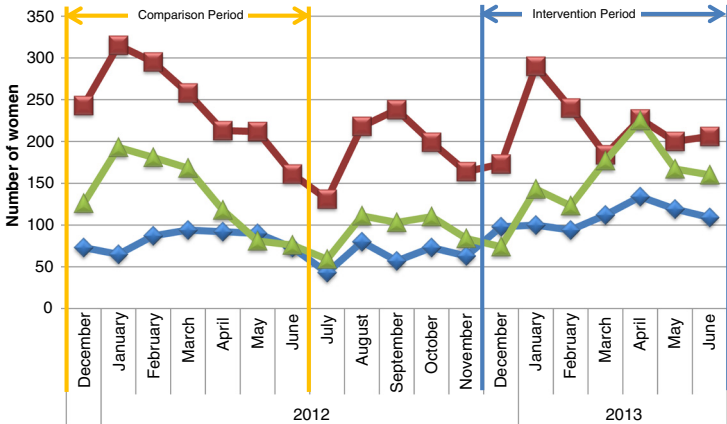

Supplement: MOESM2 [file 9458844]
